# Supplementary material for: Isolation of an Insulin-Like Receptor Involved in the Testicular Development of the Mud Crab Scylla paramamosain
Source: MDPI journal article supplement (doi:10.3390/ijms241713639), 2023-09-04
Supplement: s1 [file s1]

1 ACATGGGAACGGGATGAGCCCAGCGCATAACCTGGCGTCGTAACCCGGCGCCAGGGGTGT  
61 TGC GTTTTCG GAGGGTCCGGCACGCAGTCTCTCACCACCACCAGAAAAATTACAGTTACCA  
121 CCACCACCACTACCACCGCGACATCCACCATCGTCCTCACCACCATCACCACCACCACCA  
181 CCACCGCCGTCCACCATCACCAGTACTCAAAGACCCCTGCAGCTTTCACCACCACACGCC  
241 CCCTTGGGAAGGGCCACTACGGGCCCCACGCCGCCCTCCTACGCGCCCCCTCCGCTGCGGC  
301 AGGGGC**ATGT**GGGAGTGGCGGGCATGGGTGCTGGTGGTGCTGGCAGTGCTGGGGGGCGGCC  
**M W E W R A W V L V V L A V L G A A**  
361 AGGGAGTGCCACGCCCAAGCCCACTACGGGGAAACGTCGACTTCCGCCTCCCTTTGTCCG  
**R E C H A** Q A H Y G E T S T S A S L C P  
421 CCAAAAAGAGGCTCCTCTCAGAAAATCTGCAGCAGCATGGATTTGAGGAACAACGTGGAG  
P K R G S S Q K I C S S M D L R N N V E  
481 GAGCTGGCGAGGCTGTGTCACTGCTCCATCATTGAGGGTTACCTGCATTTCTCCTCCAG  
E L A R L C H C S I I E G Y L H F V L Q  
541 GAACAGAACGACAGCGCCTCTGCCGCCAAGCTGAGGGAGTTCACATTTCTGAAGTGCAGG  
E Q N D S A S A A K L R E F T F P E L R  
601 GAAATCACGGAGCACCTTCTCGTGTACAGAGTGTTACAGCCTTACCACCCTCAGGACGCTC  
E I T E H L L V Y R V F S L T T L R T L  
661 TTCCCCAACCTCACCGTCATCAGAGGGGAGGTGCTCTTCTACAAGTACGCCTTAGTGATC  
F P N L T V I R G E V L F Y N Y A L V I  
721 TACGACACACCTAATCTGGTGGAGGTGGGCCTGGCTTCCCTCACCTCCATCCTCAGAGGA  
Y D T P N L V E V G L A S L T S I L R G  
781 TCGGTGCGAATAGAGAGGAACCGGCAGCTGTGTACGTGACCACGGTGGACTGGACTCGC  
S V R I E R N R Q L C H V T T V D W T R  
841 ATCACCTCCAGGCCACTCACGAAAACTACATCAACCGGAACAAGCCTGAGTCGGAGTGC  
I T S R P L T K N Y I N R N K P E S E C  
901 CGCCCCTGCCCTGCTGACATGGGCTGCCCCGCCGCCACACGCTGCGGGCCCCGGGCGCTGC  
R P C P A D M G C P A A T R C G P G R C  
961 TGGGGACCCGGGGCGTGCCAGATTCTGTGTAGGAGCGGGTGTCCGGGTGGATGTGTGGGC  
W G P G A C Q I L C R S G C P G G C V G  
1021 GGGGAGTGTTGCCACGAAGAGTGTGTGCGGAGGCTGCCTCACGCCGGGAGCCCCAGGACC  
G E C C H E E C V G G C L T P G S P R T  
1081 TGCCTCGCCTGCAGGAAGTCTGGGACGTGGAGGAGGGCCGCTGCTCCCCGACTGCCCC  
C L A C R N F W D V E E G R C S P D C P  
1141 CCTGGGAAACTCAAGGTATCGAGGCACCGGTGCGAGCGGGTGAGGCGTGTCCCCATGGT  
P G K L K V S R H R C E R V Q A C P H G  
1201 CGCGCCCTGAGGCTGGACACGCGGGAGTGTGTGTGGGAGTGTCCCGCGGGCCATGAAAAC  
R A L R L D T R E C V W E C P A G H E N  
1261 ACCACCTCGGCGATCTTTGGGAGGCTGTGTGCGCCCCTGCCAAGGTCACCAATGTCCCAGG  
T T S A I F G R L C R P C Q G H Q C P R  
1321 AGGTGCCCAGGAACCTAACGTGAGTAGTGTGAGTCACGCCCAAGCACTGCGAGGCTGCACG  
R C P G T N V S S V S H A Q A L R G C T  
1381 TTGATCGAAGGAGGCCTCACCATTCTGATCAACGGTGGAGAGAATGTGCAGAAGGAGCTG

L I E G G L T I L I N G G E N V Q K E L  
 1441 GAGGAGAACCTGAGCACCATCAAGGAGGTGGAGCACTTCGTCAAAGGTGTTCCGATCCAAC  
 E E N L S T I K E V E H F V K V F R S N  
 1501 CTCACCTCGCTGACCTTCTTCTCCTCCCTCACTCGCGTCGGTGGCCTGGAACGTCTCCAC  
 L T S L T F F S S L T R V G G L E R L H  
 1561 ACTGATTACTCCGTGGTGATTCTAGACAACCCCAACTTGCAAGAACTGTGGAACGCGTCA  
 T D Y S V V I L D N P N L Q E L W N A S  
 1621 GGCTCACCATCGAGCGGGGCAAGATTCTGGTCCACGCCAACCCCTAAGCTTTGCCTCCAC  
 G L T I E R G K I L V H A N P K L C L H  
 1681 CGCGTGACACACTGGCCAACCAAAACGGGCCCTCCAGGGCTTGTCCGAGACTGATGTGAGC  
 R V H T L A N Q T G L Q G L S E T D V S  
 1741 CCGACCTCTAACGGCGATAAGATTCCCTTGTAACATCACGCCGCTGAGAGCCAACGTCAGC  
 P T S N G D K I P C N I T P L R A N V S  
 1801 ACCTCGCCCCTGTACGGCAGCTGACGGTGACGGTGGAGGCGACGCAGCTTCTGGCGTC  
 T S P L Y G T L T V T V E A T Q L P G V  
 1861 AGTGTCTACTACGTGAGCTACATGAAGACTGACACCAACATCTCCCTCTACGACAGCGAC  
 S V Y Y V S Y M K T D T N I S L Y D S D  
 1921 CAGCCATGTAGCGAGCAGGGATGGGCGATGGTAGAAATGTCAATAGTGAACGGTACTGGA  
 Q P C S E Q G W A M V E M S I V N G T G  
 1981 AAAGACGAAGGAAGCATAAGAGAGGAAGGAAGGAATAAGAAGTGAAGAAAGAAGAAG  
 K D E G S I R E E G R G I R S E E R R R  
 2041 GGAGGAGGAGGAGGAGGAGGAGGAGGAGGAGGACACATCATCTCCGGCACACTGGTCAACCTG  
 G G G G G G G G G G H I I S G T L V N L  
 2101 GATCCATTCACCCGCTACGCCGTTTTTGTCAAGACGGTTTCGCTGGACTCGAGTGCCCGC  
 D P F T R Y A V F V K T V S L D S S A R  
 2161 GGTGCCCAGTCCGAGGTGATGTACGCCACCACCAGCGCTTACAATCCCTCGGAGCCTGAG  
 G A Q S E V M Y A T T S A Y N P S E P E  
 2221 AACCCGCACTGGTCATCGCCAAACAGCTCGACGCTCAAGCTGTGGTGGCTGCCCCCCCCGA  
 N P Q W S S P N S S T L K L W W L P P R  
 2281 CACCCTAATGGCGTGATCGACCACTACCTCGTCACTCTGGTGCTGCTGCTCGACGTCCCC  
 H P N G V I D H Y L V T L V L L L D V P  
 2341 AAGATACCCGCTAGCCTTGACTTCTGCATGGAGCAAGAAAGGAGGTACCTTCAGAAAAAC  
 K I P A S L D F C M E Q E R R Y L Q K N  
 2401 CTACAGTCCGACCTGGTGATGAGATCCACGTCCTACTCCGACGAAGACGAGATCGAGGAC  
 L Q S D L V M R S T S Y S D E D E I E D  
 2461 GAAGAGGACGCGATGGACGAAGAGGAGGAGCACGACGAGGAGGATGACGAGGACGAGGAT  
 E E D A M D E E E E H D E E D D E D E D  
 2521 TGGGACAAGGACGTGAGAATGTACAGGAACGAGACGAGAACGGATGGGGACAAAGATGGG  
 W D K D V R M Y R N E T R T D G D K D G  
 2581 GAGCTCTCGTGTGCGCCAGGCCTCGCACTTACGGCTTCGTCCCTCGTCCCTCGTGCTGCGCC  
 E L S C R Q A S H F T A S S S S S C C A  
 2641 TGCCCGGAGTCGCCTTCGTCTGAGAGTGACGGGGATGTCCCTCGGTCAGATCGCCTTTGAG  
 C P E S P S S E S D G D V L G Q I A F E  
 2701 GACTTCATTATGGACAGCGTTTACGTGAAGAAAGCGGGGAGAGGCAGGAGAAGAGCCCGG

2761 D F I M D S V Y V K K A G R G R R R A R  
 GAGAGACCGCACCAACTGGACGCCTTCGAAAAGAACCTCCGCGCCACCTACCAGCAGCCT  
 E R P H Q L D A F E K N L R A T Y Q Q P  
 2821 CGCAGCACCAGACAAGTGCACCACCCAAGGACTTTGGTCTCAAGGAGCTTAGACTCAAGA  
 R S T R Q V H H P R T L V S R S L D S R  
 2881 GAGGACCACACGCAGCTTCCTATTGTCTCTGAGGGTGGGGTAATGGAGGAGTATCGTCAT  
 E D H T Q L P I V S E G G V M E E Y R H  
 2941 CATCAGCAGCAGTATCACGAGGAAGGGCAAGGAGGTGACTTCCCTTCGTACCCTGAGGAG  
 H Q Q Q Y H E E G Q G G D F P S Y P E E  
 3001 TCGGTGCACGAGTTTCCCAGCCAGGGAGGCATAAGGGCAGAGTATCAGCTGCACGAGGGC  
 S V H E F P S Q G G I R A E Y Q L H E G  
 3061 GACCTGCACAAGTATAACGAGCCTCTACCCCAGCTTGGTTCAGTCCTCCGCCTTCAGATA  
 D L H K Y N E P L P Q L G S V L R L Q I  
 3121 CGCCAGACTCGTAACCTTCACCTACCATCCACCGCCTGCTGCACTTCTCCCTCTACTCC  
 R Q T R N L H L T I H R L L H F S L Y S  
 3181 GTCAGTATCGTGGCGTGTGAGGCACCCGAGCCACTCCTGCCAGACACGTGGATGAAGCTG  
 V S I V A C Q A P E P L L P D T W M K L  
 3241 TGTTCCCTCCATCCAGCCCAGACTGCAGCCTACACCAAGCCAAGCGTCGAGGGGGACCAT  
 C S L H P A Q T A A Y T K P S V E G D H  
 3301 GTGCGAGCGGGGTCCCTCAAGGTGATGCTACTCAACGGTACCCTGGGCTCCGTCTCTCTC  
 V R A G S L K V M L L N G T L G S V S L  
 3361 TCCTGGGAGGCGCCGAGGAGTCCCAACGGAGGGGTGTTGGCTTACGTCATCAGGCTGCAA  
 S W E A P R S P N G G V L A Y V I R L Q  
 3421 GGGCCCCTACGGGAGGAGCGGTGCATCACCCACAGGCAGTTCGAGGGCGCAGGACGGGCGG  
 G P L R E E R C I T H R Q F E A Q D G R  
 3481 CTGGAGCTGGATGACTTGAGCCCCGGGAACCTACAGTGTCTCCATCAGGGTCAGGTCCAAG  
 L E L D D L S P G N Y S V S I R V R S K  
 3541 GCTAAGTTTGGCCCTTACAGTGAGCCCGTGTCTTCATCATCCCGGGTCACGCCCCCAAG  
 A K F G P Y S E P V F F I I P G H A P K  
 3601 CCAAGCCCTCCTGCCCTTCGCTTGGTACTCTCTGCCGTACTGGGTGTGGTGGGCATGGTC  
 P S P P A L R L V L S A V L G V V G M V  
 3661 GCTGCGGGCCTCGGGTGTGGGGCTGGAGGAGATACCACACTCGTTACACTATCCCTGAC  
 A A G L G C W G W R R Y H T R Y T I P D  
 3721 ATCATGGAGGAGGTGGACGAGAACCCTGCTATCGAGGGGGATTGCTCCTGCCGAGATG  
 I M E E V D E N P C Y R G G F A P A E M  
 3781 TTCCGGCAGGAGTTTATCTTCTGGCGAGACGACCTGAAGGTGCTGCAGGACCGTCCGCTG  
 F R Q E F I F W R D D L K V L Q D R P L  
 3841 GGCAAGGGGTCTTCGGGATGGTGTGTTGAGGGAGAACTGACTCACGGGGGCAAGACGCGA  
 G K G F F G M V F E G E L T H G G K T R  
 3901 GTGGCGGTGAAGACCCACACGAGAGGGGCCAGCAAGGACGATATACTGCAGTTCCTTAAG  
 V A V K T H T E R A S K D D I L Q F L K  
 3961 GAGGCGGTGTCATGCAGAACATCTCATGCCATCACGTGGTGCGTCTGCTGGGGGTGGTG  
 E A A V M Q N I S C H H V V R L L G V V  
 4021 GGCGACTATTACCGGTCTACGTGGTGATGGAGCTCATGGAACAAGGTGACCTCAAGAGC

G D Y S P V Y V V M E L M E Q G D L K S  
 4081 TTCCTTCAGCGCAACCCTCGCCACCACGTCTCGGAGGAGAAGCTGGTGGAGATGGCAGTG  
 F L Q R N P R H H V S E E K L V E M A V  
 4141 CAGGCGGCTGACGGGATGGCGTACCTAGCAGAGGGGAGGCTGGTGCACCGGGACCTCGCC  
 Q A A D G M A Y L A E G R L V H R D L A  
 4201 GCCAGAACTGTTTGCTGGACCACAACCTTGTGCTTAAGATCGGAGACTTCGGGTTGTCT  
 A R N C L L D H N L V L K I G D F G L S  
 4261 CGGAGCCTCAAATCAGACTACTATAGGAAAAGAGGGCCAGGGAGTGCTGCCCGTTAAGTGG  
 R S L K S D Y Y R K E G Q G V L P V K W  
 4321 ATGGCCCCGAGAGTCTCCAACGCAGCGTTTATAGCACTCACAGCGACATGTGGAGCTAC  
 M A P E S L Q R S V Y S T H S D M W S Y  
 4381 GGAGTGCTGCTGTGGGAGATGGCGACGAGGGGACTCACGCCCTACAAGAACTGCACCAAC  
 G V L L W E M A T R G L T P Y K N C T N  
 4441 GAGGAGGTGATCCGGCTGGTGGTGGAGAAGTACGCAACCCTTGACAGGCCGAGGGACAGC  
 E E V I R L V V E K Y A T L D R P R D S  
 4501 CCGCAGCCCTTCCAGAGACTCATGCGGCAGTGCTGGCGCTACGACCCTCGAGAGCGCCCC  
 P Q P F Q R L M R Q C W R Y D P R E R P  
 4561 ACATTCTTGCAGTGACCAAGTTTCTCCTGAGGCATACGTCGTCTGAGTTCCAGGAGAGG  
 T F L A V T K F L L R H T S S E F Q E R  
 4621 TTCGAAAAAGTGCCTTCTATCACAGCCGCTCCAGTGACTATGCCAAGTACCGGCAGGCC  
 F E K V S F Y H S R S S D Y A K Y R Q A  
 4681 AGCAAGGGCAGCTTCATGAGTGGTGGGGGGCGGGGCAGCGATGATGATGCCTCGGACGAT  
 S K G S F M S G G G R G S D D D A S D D  
 4741 ATCGCCCTTGTGTCGTCGTCTGAGAGTGACGAAGAAATCTCGGAAGACGGCGTCTGCGC  
 I A L V S S S E S D E E I S E D G V L R  
 4801 TTCAGGACTCCTCACGGCAGTCCTAGGACCACCAGGAGATCTCCTAGAGGTGCGAAAGGC  
 F R T P H G S P R T T R R S P R G A K G  
 4861 GAGATGTCCACCACATTGCTGGGCATGGGTGGCAAGAGTCTGTGCAGGATAGCTGGCGGC  
 E M S T T L L G M G G K S L C R I A G G  
 4921 GTGACGGGACCTTCAGACTGGAGCCGCTCCGCCGCGCCTTCCGTCCTGCACTTCTACACC  
 V T G P S D W S R S A A P S V L H F Y T  
 4981 AACGTGAGCCCCGACGCGCGGCCTGGCAAGGCAGTGTGTGGGGCGGACCACAGCTCGGCT  
 N V S P D A R P G K A V C G A D H S S A  
 5041 GTGGTGACAGTGCCGGTGAAGACGAGCGGGACCTTCGATACGCTCAGCTGGCACTCAGC  
 V V H S A G E D E R D L R Y A Q L A L S  
 5101 ACGCCCAGCACACCAGCCAGTGGGAGTCGCACGCCCCCTCCGCACTCCCGGGTCTACGCCA  
 T P S T P A S G S R T P L R T P G S T P  
 5161 CACACACCCTTCTACACCCAATACAGCCGCGTTCCCCTTGCCGTCTTCCCCAGGTGTA  
 H T P F L H P N T A A F P L P S S P G V  
 5221 TCTGGCTGTTCTCCGTCGTTCTGACCCGCATAAAGGAGAAAAGCTCTGTCTCGTCGAAG  
 S G C S P S F L Q P H K G E S S V S S K  
 5281 AGTCCCTCCCAGGTCAGCCTTGCCACTTCGCCGTCCGCCGCCAAACCCTCAGCGCCATTC  
 S P S Q V S L A T S P S A A K P S A P F  
 5341 TACTCAAACCTAGCCAAGTCTTTGTCCACGCTCATCGCTAGGACTTCTGCTCACCCCTCAT
