# Supplementary material for: Isolation of an Insulin-Like Receptor Involved in the Testicular Development of the Mud Crab Scylla paramamosain
Source: MDPI journal article supplement (doi:10.3390/ijms241713639), 2023-09-04
Supplement: s1 [file s1]

**Supplementary Table S1.** Primers used in this study.

| <b>Primer</b> | <b>Primer sequence (5'-3')</b> | <b>Application</b> |
|---------------|--------------------------------|--------------------|
| IR-F1         | CCATCAGGGTCAGGTCCAA            | cDNA cloning       |
| IR-R1         | CCCGAAGTCGCCGATCTTA            | cDNA cloning       |
| IR-F2         | CATCAGGGTCAGGTCCAA             | cDNA cloning       |
| IR-R2         | CGGAGAACAGCCAGATACA            | cDNA cloning       |
| IR-3'-1       | CTCCCAGGTCAGCCTTGCCACTTCG      | 3'RACE             |
| IR-3'-2       | GGCCACAACGATCTAAATCAAAGTT      | 3'RACE             |
| IR-3'-3       | ACGCCACCAAGAGCCTCAGAAAGCC      | 3'RACE             |
| IR-5'-1       | TCCACCGTTTTCTCTCCTCTACACA      | 5'RACE             |
| IR-5'-2       | GGGAAGTCACCTCCTTGCCCTTCCTCG    | 5'RACE             |
| IR-5'-3       | CTGGCGACACGAGAGCTCCCCATCTTT    | 5'RACE             |
| IR-OF         | ACATCCACCATCGTCCTCACCA         | ORF cloning        |
| IR-OR         | ACAGACAGCAGGACAGGAGGTG         | ORF cloning        |
| IR-qF         | AAGCGTCTGTGATGGAAT             | qRT-PCR            |
| IR-qR         | GGTGTTGAGTGTGGTGTA             | qRT-PCR            |
| β-actin-qF    | GAGCGAGAAATCGTTCGTGAC          | qRT-PCR            |
| β-actin-qR    | GGAAGGAAGGCTGGAAGAGAG          | qRT-PCR            |
| vasa-qF       | TGGCTGCTCGTGGGTTAGA            | qRT-PCR            |
| vasa-qR       | TCCTGTTCGTCCGATGCG             | qRT-PCR            |
| Dsx-qF        | CCCACCCATCACTTCACGTT           | qRT-PCR            |
| Dsx-qR        | GTCACCTCCACCATCCTTCG           | qRT-PCR            |
| GFP-F         | TGGGCGTGGATAGCGGTTTG           | RNAi               |
| GFP-R         | GGTCGGGGTAGCGGCTGAAG           | RNAi               |
| dsIR-F        | AGGACTTCTGCTCACCTCA            | RNAi               |
| dsIR-R        | CGCGTGAAGTCGTCTGAATA           | RNAi               |
| IR-IF         | TCCACCATCGTCCTCACCAC           | ISH                |
| IR-IR         | CAGCACCACCAGCACCCA             | ISH                |
